1

2 Title:

3 The absence of C-5 DNA methylation in *Leishmania donovani* allows DNA enrichment from complex  
4 samples

5 Authors:

6 Cuypers B<sup>1, 2#</sup>, Dumetz F<sup>1\*#</sup>, Meysman P<sup>2</sup>, Laukens K<sup>2</sup>, De Muylder G<sup>1</sup>, Dujardin J-C<sup>1, 3</sup> and Domagalska  
7 MA<sup>1</sup>

8 Affiliations:

9 <sup>1</sup> Molecular Parasitology, Institute of Tropical Medicine, Antwerp, Belgium, <sup>2</sup> ADReM Data Lab,  
10 Department of Computer Science, University of Antwerp, Antwerp, Belgium, <sup>3</sup> Department of  
11 Biomedical Sciences, University of Antwerp, Antwerp, Belgium. \* Present address: Merrick's Lab,  
12 Department of Pathology, University of Cambridge, Cambridge, UK # Contributed equally.

13 Corresponding author: [mdomagalska@itg.be](mailto:mdomagalska@itg.be)

14 Keywords:

15 Leishmania, Trypanosomatids, DNA-Methylation, Epigenomics, Whole Genome Bisulfite Sequencing,  
16 DNA-Enrichment

17

## 18 **Abstract**

19 Cytosine C5 methylation is an important epigenetic control mechanism in a wide array of Eukaryotic  
20 organisms and generally carried out by proteins of C-5 DNA methyltransferase family (DNMTs). In  
21 several protozoans the status of this mechanism remains elusive, such as in *Leishmania*, the  
22 causative agent of the disease leishmaniasis in humans and a wide array of vertebrate animals. In  
23 this work, we show that the *Leishmania donovani* genome contains a C-5 DNA methyltransferase  
24 (*DNMT*) from the *DNMT6* subfamily, of which the function is still unclear, and verified its expression  
25 at RNA level. We created viable overexpressor and knock-out lines of this enzyme and characterised  
26 their genome-wide methylation patterns using whole-genome bisulfite sequencing, together with  
27 promastigote and amastigote control lines. Interestingly, despite *DNMT6* presence, we found that  
28 methylation levels were equal to or lower than 0.0003% at CpG sites, 0.0005% at CHG sites and  
29 0.0126% at CHH sites at genome scale. As none of the methylated sites were retained after manual  
30 verification, we conclude that there is no evidence for DNA methylation in this species. We  
31 demonstrate that this difference in DNA methylation between the parasite (no detectable DNA  
32 methylation) and the vertebrate host (DNA methylation), allows enrichment of parasite versus host  
33 DNA using Methyl-CpG-binding domain columns, readily available in commercial kits. As such, we  
34 depleted methylated DNA from mixes of *Leishmania* promastigote and amastigote DNA with human  
35 DNA, resulting in average *Leishmania*:human enrichments from 62x up to 263x. These results open a  
36 promising avenue for unmethylated DNA enrichment as a pre-enrichment step before sequencing  
37 *Leishmania* clinical samples.

## 38 Introduction

39 DNA methylation is an epigenetic mechanism responsible for a diverse set of functions across the  
40 three domains of life, Eubacteria, Archeabacteria, and Eukaryota. In Prokaryotes, many DNA  
41 methylation enzymes are part of so-called restriction modification systems, which play a crucial role  
42 in their defence against phages and viruses. Prokaryotic methylation typically occurs on the C5  
43 position of cytosine (cytosine C5 methylation), the exocyclic amino groups of adenine (adenine-N6  
44 methylation) or cytosine (cytosine-N4 methylation) (1). In Eukaryotic species, DNA methylation is  
45 mostly restricted to 5-methylcytosine (me<sup>5</sup>C) and best characterised in mammals, where 70-80% of  
46 the CpG motifs are methylated (2). As such, DNA methylation controls a wide range of important  
47 cellular functions, such as genomic imprinting, X-chromosome inactivation (in humans), gene  
48 expression and the repression of transposable elements. Consequently, defects in genetic imprinting  
49 are associated with a variety of human diseases and changes in DNA methylation patterns are  
50 common hallmark of cancer (3,4). Eukaryotic DNA methylation can also occur at CHG and CHH  
51 (where H is A, C or T) sites (5), which was considered to occur primarily in plants. However, studies  
52 from the past decade demonstrate that CHG and CHH methylation are also frequent in several  
53 mammalian cells types, such as embryonic stem cells, oocytes and brains cells (5-8).

54 Me<sup>5</sup>C methylation is mediated by a group of enzymes called C-5 DNA methyltransferases (DNMTs).  
55 This ancient group of enzymes share a common ancestry and their core domains are conserved  
56 across Prokaryotes and Eukaryotes (1). Different DNMT subfamilies have developed distinct roles  
57 within epigenetic control mechanisms. For example, in mammals DNMT3a and DNMT3b are  
58 responsible for *de novo* methylation, such as during germ cell differentiation and early development,  
59 or in specific tissues undergoing dynamic methylation (9). In contrast, DNMT1 is responsible for  
60 maintaining methylation patterns, particularly during the S phase of the cell cycle where it  
61 methylates the newly generated hemimethylated sites on the DNA daughter strands (10). Some  
62 DNMTs have also changed substrate over the course of evolution. A large family of DNMTs, called  
63 DNMT2, has been shown to methylate the 38th position of different tRNAs to yield ribo-5-  
64 methylcytidine (rm5C) in a range of Eukaryotic organisms, including humans (11), mice (12),  
65 *Arabidopsis thaliana* (13) and *Drosophila melanogaster* (14). Therefore, DNMT2s are now often  
66 referred to as 'tRNA methyltransferases' or trDNMT and are known to carry out diverse regulatory  
67 functions (15). However, in other Eukaryotic taxa, DNMT2 appears to be a genuine DNMT, as DNMT2  
68 can catalyze DNA methylation in *Plasmodium falciparum* (16), and *Schistosoma mansoni* (17). In  
69 *Entamoeba histolytica* both DNA and RNA can be used as substrates for DNMT2 (18,19). The  
70 increase in available reference genomes of non-model Eukaryotic species has recently also resulted

71 in the discovery of new DNMTs, such as DNMT5, DNMT6 or even SymbioLINE-DNMT, a massive  
72 family of DNMTs, so far only found in the dinoflagellate *Symbiodinium* (20).

73 Indeed, DNMT mediated C5 methylation has been shown to be of major functional importance in a  
74 wide array of Eukaryotic species, including also protozoans such as *Toxoplasma gondii* and  
75 *Plasmodium* (16,21). In contrast, studies have failed to detect any C5 DNA methylation in Eukaryotic  
76 species such as *Caenorhabditis elegans*, *Saccharomyces cerevisiae* and *Schizosaccharomyces pombe*  
77 (22,23). In many other protozoans, the presence and potential role of DNA-methylation remains  
78 elusive. This is especially true for *Leishmania*, a Trypanosomatid parasite (Phylum Euglenozoa),  
79 despite its medical and veterinary importance. *Leishmania* is the causative agent of the leishmaniasis  
80 in humans and a wide variety of vertebrate animals, a disease that ranges from self-healing  
81 cutaneous lesions to lethal visceral leishmaniasis.

82 *Leishmania* features a molecular biology that is remarkably different from other Eukaryotes. This  
83 includes a system of polycistronic transcription of functionally unrelated genes (24). The successful  
84 transcription of these cistrons depends at least on several known epigenetic modifications at the  
85 transcription start sites (acetylated histone H3) and transcription termination sites ( $\beta$ -D-glucosyl-  
86 hydroxymethyluracil, also called 'Base J'), but little research has been done towards other epigenetic  
87 modifications (25). We were therefore interested in the 5-C methylation status of *Leishmania*, which  
88 has been poorly explored to date. In this context, a single study on a wide range of Eukaryotic  
89 species lacking DNMT1 reported the absence of CG-specific methylation in *Leishmania major*,  
90 however, using only a single sample of an unspecified life stage (26). The study also does not  
91 comment on CHH and CHG specific methylation, which can be relevant as well. Contrastingly,  
92 another manuscript demonstrated Me<sup>5</sup>C methylation in *T. brucei*, another Trypanosomatid species,  
93 although at low levels (0.01 %) (27). To clarify the status of C-5 DNA methylation in Trypanosomatids  
94 and *Leishmania* in particular, we present the first comprehensive study of genomic methylation in  
95 *Leishmania* across different parasite life stages, making use of high-resolution whole genome  
96 bisulfite sequencing.

## 97 **Materials and Methods**

### 98 *In silico* identification and phylogeny of putative DNMTs

99 To identify putative C-5 cytosine-specific DNA methylases in *Leishmania donovani*, we obtained the  
100 hidden Markov model (hmm) for this protein family from PFAM version 32.0 (Accession number:  
101 PF00145) (28). The hmm search tool of hmmer-3.2.1 (hmmer.org) was then used with default  
102 settings to screen the LdBPKV2 reference genome for this hmm signature (29). The initial pairwise  
103 alignment between the identified *L. donovani* and *T. brucei* C5 DNA MTase was carried out with T-  
104 COFFEE V\_11.00.d625267.

105 To construct a comprehensive phylogenetic tree of the C5 DNA MTase family, including members  
106 found in Trypanosomatid species, we modified the approach from Ponts et al. (16). Firstly, we  
107 downloaded the putative proteomes of a wide range of Prokaryotic and Eukaryotic species. These  
108 species were selected to cover the different C5 DNA MTase subfamilies (1). Specifically, the following  
109 proteomes were obtained: *Trypanosoma brucei* TREU92, *Trypanosoma vivax* Y486 and *Leishmania*  
110 *major* Friedlin from TriTrypDB v41 (24,30,31), *Plasmodium falciparum* 3D7, and *Plasmodium vivax*  
111 P01 from PlasmodDB v41 (32-34), *Cryptosporidium parvum* Iowa II and *Cryptosporidium hominis*  
112 TU502 from CryptoDB v41 (35-37), *Toxoplasma gondii* ARI from ToxoDB v 41 (38,39), *Euglena gracilis*  
113 Z1 (PRJNA298469) (40), *Entamoeba histolytica* HM-1:IMSS (GCF\_000208925.1) (41),  
114 *Schizosaccharomyces pombe* ASM294 (GCF\_000002945.1) (42), *Saccharomyces cerevisiae* S288C  
115 (GCF\_000146045.2), *Neurospora crassa* OR74A (GCF\_000182925.2) (43), *Arabidopsis thaliana*  
116 (GCF\_000001735.4), *Drosophila melanogaster* (GCF\_000001215.4), *Homo sapiens* GRCh38.p12  
117 (GCF\_000001405.38), *Bacillus subtilis* 168 (GCF\_000009045.1), *Clostridium botulinum* ATCC 3502  
118 (GCF\_000063585.1) (44), *Streptococcus pneumoniae* R6 (GCF\_000007045.1) (45), *Agrobacterium*  
119 *tumefaciens* (GCF\_000971565.1) (46), *Salmonella enterica* CT18 (GCF\_000195995.1) (47) and  
120 *Escherichia coli* K12 (GCF\_000005845.2) from NCBI, *Ascobolus immersus* RN42 (48) from the JGI  
121 Genome Portal (genome.jgi.doe.gov) and *Danio rerio* (GRCz11) from Ensembl (ensembl.org).

122 All obtained proteomes were then searched with the hmm signature for C5 DNA MTases, exactly as  
123 described above for *L. donovani*. All hits with an E-value < 0.01 (i.e. 1 false positive hit is expected in  
124 every 100 searches with different query sequences) were maintained, and all domains matching the  
125 query hmm were extracted and merged per protein. This set of sequences was aligned in Mega-X  
126 with the MUSCLE multiple sequence alignment algorithm (49,50) and converted to the PHYLIP  
127 format with the ALTER tool (51). Phage sequences and closely related isoforms were removed.

128 A maximum likelihood tree of this alignment was generated with RAXML version 8.2.10 using the  
129 automatic protein model assignment algorithm (option: -m PROTGAMMAAUTO). RAXML was run in

130 three steps: Firstly, 20 trees were generated and only the one with the highest likelihood score was  
131 kept. Secondly, 1000 bootstrap replicates were generated. In a final step, the bootstrap bipartitions  
132 were drawn on the best tree from the first round. The tree was visualised in Figtree v1.4.4  
133 (<https://github.com/rambaut/figtree/>).

#### 134 [Culturing & DNA extraction for Bisulfite Sequencing](#)

135 Promastigotes (extracellular life stage) of *Leishmania donovani* MHOM/NP/03/BPK282/0 cl4 (further  
136 called BPK282) and its genetically modified daughter lines (see below) were cultured in HOMEM  
137 (Gibco) supplemented with 20% (v:v) heat-inactivated foetal bovine serum at 26°C. Amastigotes  
138 (intracellular life stage) of the same strain were obtained from three months infected golden Syrian  
139 hamster (Charles Rivers) as described in Dumetz *et al.* (29) and respecting BM2013-8 ethical  
140 clearance from Institute of Tropical Medicine (ITM) Animal Ethic Committee. Briefly, 5 week old  
141 female golden hamsters were infected via intracardiac injection of  $5 \cdot 10^5$  stationary phase  
142 promastigotes. Three months post infection, hamsters were euthanised and amastigotes were  
143 purified from the liver by Percol gradient (GE Healthcare) after homogenisation. *T. brucei gambiense*  
144 MBA blood stream forms were obtained from OF-1 mice when the parasitaemia was at its highest,  
145 according to ITM Animal Ethic Committee decision BM2013-1. Parasites were separated from the  
146 whole blood as described in Tihon *et al.* (52). Briefly, the parasites were separated from the blood by  
147 placing the whole blood on an anion exchanger Diethylaminoethyl (DEAE)-cellulose resin (Whatman)  
148 suspended in phosphate saline glucose (PSG) buffer, pH 8. After elution and two washes on PSG,  
149 DNA was extracted. DNA of *L. donovani*, both promastigotes and amastigotes, as well as *T. brucei*  
150 was extracted using DNeasy Blood & Tissue kit (Qiagen) according manufacturer instructions.

151 *Arabidopsis thaliana* Col-0 was grown for 21 days under long day conditions, i.e. 16 hrs light and 8  
152 hrs darkness. DNA was then extracted from the whole rosette leaves using the DNeasy Plant Mini Kit  
153 (Qiagen).

#### 154 [Genetic engineering of \*L. donovani\* BPK282](#)

155 We generated both an LdDNMT overexpressing (LdDNMT+) and null mutant line (LdDNMT-/-) of *L.*  
156 *donovani* BPK282. All the PCR products generated to produce the constructs for LdDNMToverex and  
157 LdDNMTKO were sequenced at the VIB sequencing facility using the same primer as for the  
158 amplification. For LdDNMToverex, the overexpression construct, pLEXSY-DNMT, was generated by  
159 PCR amplification of LdBPK\_251230 from BPK282 genomic DNA using Phusion (NEB) and cloned  
160 inside the expression vector pLEXSY-Hyg2 (JENA bioscience) using NEBuilder (NEB) according to  
161 manufacturer's instruction for primer design and cloning instructions (sup table for primers list).  
162 Once generated, 10 µg of pLEXSY-DNMT was electroporated in  $5 \cdot 10^7$  BPK282 promastigotes from

163 logarithmic culture using cytomix on a GenePulserX (BioRad) according to LeBowitz (1994) (53) and  
164 selected *in vitro* by adding 50 µg/mL hygromycin B (JENA Bioscience) until parasite growth (54).  
165 Verification of overexpression was carried out by qPCR on a LightCycler480 (Roche) using SensiMix  
166 SYBR No-ROX (Bioline) on cDNA. Briefly, 10<sup>8</sup> logarithmic-phase promastigotes were pelleted, RNA  
167 extraction was performed using RNAqueous-Micro total RNA isolation kit (Ambion) and quantified  
168 by Qubit and the Qubit RNA BR assay (Life Technologies, Inc.). Transcriptor reverse transcriptase  
169 (Roche) was used to synthesise cDNA following manufacturer's instructions. qPCRs were run on a  
170 LightCycler 480 (Roche) with a SensiMix SYBR No-ROX kit (Bioline); primer sequences available in  
171 **Supplementary Table S1**. Normalisation was performed using two transcripts previously described  
172 as stable in promastigotes and amastigotes in Dumetz et al. (2018) (55), LdBPK\_340035000 and  
173 LdBPK\_240021200.

174 For the generation of LdDNMT<sup>-/-</sup>, a two-step gene replacement strategy was used: replacing the first  
175 allele of LdBPK\_250018100.1 by nourseothricin resistance gene (SAT) and the second allele by a  
176 puromycin resistance gene (Puro). Briefly, each drug resistance gene was PCR amplified from pCL3S  
177 and pCL3P using Phusion (NEB) and cloned between 300 bp of PCR amplified DNA fragments of the  
178 LdBPK\_250018100.1 5' and 3' UTR using NEBuilder (NEB) inside pUC19 for construct amplification in  
179 *E. coli* DH5α (Promega) (cf. primer list in **Supplementary Table S1**). Each replacement construct was  
180 excised from pUC19 using SmaI (NEB), dephosphorylated using Antarctic Phosphatase (NEB) and 10  
181 µg of DNA was used for the electroporation in the same conditions as previously described to insert  
182 the pLEXSY-DNMT. The knock-out was confirmed by whole genome sequencing.

### 183 Bisulfite sequencing and data analysis

184 For each sample, one microgram of genomic DNA was used for bisulfite conversion with  
185 innuCONVERT Bisulfite All-In-One Kit (Analytikjena). Sequencing libraries were prepared with the  
186 TruSeq DNA Methylation kit according to the manufacturer's instructions (Illumina). The resulting  
187 libraries were paired-end (2 x 100bp) sequenced on the Illumina HiSeq 1500 platform of the  
188 University of Antwerp (Centre of Medical Genetics). The sequencing quality was first verified with  
189 FastQC v0.11.4. Raw reads generated for each sample were aligned to their respective reference  
190 genome with BSseeker 2-2.0.3 (56): LdBPK282v2 (29) for *L. donovani*, TREU927 (30) for *T. brucei* and  
191 Tair10 (57) for the *A. thaliana* positive control. Samtools fixmate (option -m) and samtools markdup  
192 (option -r) were then used to remove duplicate reads. CpG, CHG and CHH methylation sites were  
193 subsequently called with the BS-Seeker2 'call' tool using default settings and further filtered with our  
194 Python3 workflow called 'Bisulfilter' (available at <https://github.com/CuypersBart/Bisulfilter>).  
195 Genome-wide visualisation of methylated regions was then carried out with ggplot2 in R (58). In

196 *Leishmania*, the positions that passed our detection thresholds (coverage > 25, methylation  
197 percentage > 0.8), were then manually inspected in IGV 2.5.0 (59).

#### 198 *Leishmania* DNA enrichment from a mix of human and *Leishmania* DNA

199 To check whether the lack of detectable DNA methylation in *Leishmania* can be used for the  
200 enrichment of *Leishmania* versus (methylated) human DNA, we carried out methylated DNA removal  
201 on two types of samples: (1) An artificial mix of *L. donovani* BPK282/O cl4 promastigote DNA with  
202 human DNA (Promega) from 1/15 to 1/150000 (*Leishmania*:human) and (2) Linked promastigote and  
203 hamster-derived amastigote samples from 3 clinical *Leishmania donovani* strains (BPK275, BPK282  
204 and BPK026), which were generated in previous work (29). For this experiment, we used a 1/1500  
205 artificial mix of promastigote DNA and human DNA (Promega) to reflect the median ratio found in  
206 clinical samples. For each of the three biological replicates (strains), we carried out the experiment in  
207 duplicate (technical replicates). All parasite DNA was extracted with the DNA (DNeasy Blood & Tissue  
208 kit, Qiagen). *Leishmania* DNA (0.0017 ng/ $\mu$ L) was then enriched from the human DNA (25ng/ $\mu$ L)  
209 using NEBNext Microbiome DNA Enrichment Kit (NEB) according to manufacturer instructions.  
210 Evaluation of the ratio *Leishmania*/human DNA was performed by qPCR on LightCycler480 (Roche)  
211 using SensiMix SYBR No-ROX (Bioline) and RPL30 primers provided in the kit to measure human DNA  
212 and *Leishmania* CS primers (Cysteine synthase) (60).



## 213 Results

### 214 The *Leishmania* genome contains a putative C-5 DNA methyltransferase (DNMT)

215 Eukaryotic DNA methylation typically requires the presence of a functional C-5 cytosine-specific DNA  
216 methylase (C5 DNA MTase). This type of enzymes specifically methylates the C-5 position of  
217 cytosines in DNA, using S-Adenosyl methionine as a methyl-donor. To check for the presence of C5  
218 DNA MTases in *Leishmania donovani*, we carried out a deep search of the parasite's genome. In  
219 particular, we used the LdBPKv2 reference genome (29) and searched the predicted protein  
220 sequences of this assembly using the hidden-markov-model (hmm) signature of the C5 DNA MTase  
221 protein family obtained from PFAM (PF00145) and obtained a single hit: the protein  
222 LdBPK\_250018100.1, (E-value: 2.7e-40). LdBPK\_250018100.1 was already annotated as 'modification  
223 methylase-like protein' with a predicted length of 840 amino acids. We will further refer to this  
224 protein as LdDNMT. Interestingly, in another Trypanosomatid species, *Trypanosoma brucei*, the  
225 homolog of this protein (Tb927.3.1360 or TbDNMT) has been previously been studied in detail by  
226 Militello et al (27). Moreover, these authors showed that TbDNMT has all the ten conserved  
227 domains that are present in functional DNMTs. We aligned TbDNMT with LdDNMT using T-Coffee  
228 (Fig. 1) and found that these 10 domains are also present in LdDNMT, including also the putative  
229 catalytic cysteine residue in domain IV.

### 230 *Leishmania* and Trypanosomatid C-5 DNA belong to the Eukaryotic DNMT6 family

231 To learn more about the putative function and evolutionary history of this protein, we wanted to  
232 characterise the position of *LdDNMT* and those of related Trypanosomatid species within the DNMT  
233 phylogenetic tree. Consequently, we collected the publicly available, putative proteomes of a wide  
234 range of Prokaryotic and Eukaryotic species, searched them for the hmm signature of the C5-DNMT  
235 family, aligned the identified proteins and generated a RAxML maximum likelihood tree. In total we  
236 identified 131 putative family members in the genomes of 24 species (E-value < 0.01), including 4  
237 Prokaryotic (*Agrobacterium tumefaciens*, *Salmonella enterica*, *Escherichia coli* and *Clostridium*  
238 *botulinum*) and 20 Eukaryotic species. These Eukaryotic species were selected to contain organisms  
239 from the Excavata Phylum (of which *Leishmania* is part) and a range of other, often better-  
240 characterised Phyla as a reference. The Excavata species included 4 Trypanosomatids (*Leishmania*  
241 *donovani*, *Leishmania major*, *Trypanosoma brucei* and *Trypanosoma vivax*), 1 other, non-  
242 Trypanosomatid Euglenozoid species (*Euglena gracilis*) and 1 other non-Euglenozoid species  
243 (*Naegleria gruberi*). The other Eukaryotic Phyla included in the analysis were: Apicomplexa  
244 (*Plasmodium vivax*, *Plasmodium falciparum*, *Cryptosporidium parvum*, *Cryptosporidium hominis*),

245 Amoebozoa (*Entamoeba histolytica*), Angiosperma (*Arabidopsis thaliana*, *Oryza sativa*), Ascomycota  
246 (*Ascobolus immerses*, *Neurospora crassa*) and Chordata (*Homo Sapiens*, *Danio rerio*) (Figure 2).

247 Our phylogenetic tree was able to clearly separate known DNMT subgroups, including DNMT1,  
248 DNMT2, DNMT3, DRM (Domain rearranged methyltransferase), DIM and 2 groups of Prokaryotic  
249 DNMTs (1,16,61). Interestingly, the tree also showed that Trypanosomatid DNMTs group together  
250 and are part of the much less-characterised DNMT6 group, as has been previously described for  
251 *Leishmania major* and *Trypanosoma brucei* (20). This group of DNMTs has also been found also in  
252 diatoms (e.g. *Thalassiosira*) and recently in dinoflagellates (e.g. *Symbiodinium kawagutii* and  
253 *Symbiodinium minutum*), but its function remains elusive (20,62). The most closely related branch to  
254 DNMT6 contains a group of bacterial DNMTs (here represented by *Agrobacterium tumefaciens*,  
255 *Salmonella enterica*, *Escherichia coli*). This highlights that DNMT6 emerged from the pool of  
256 Prokaryotic DNMTs independently from the groups previously mentioned. The fact that another  
257 Euglenozoid, *Euglena gracilis*, has DNMT1, DNMT2, DNMT4 and DNMT5, while another Excavata  
258 species, *Naegleria gruberi* has both a DNMT1 and a DNMT2, suggests that the ancestors of the  
259 current Excavata species possessed a wide battery of DNMTs including also DNMT6. In the lineage  
260 that eventually led to Trypanosomatids, these were all lost, except DNMT6.

#### 261 [Whole genome bisulfite sequencing reveals no evidence for functional C-5 methylation](#)

262 As 1) we identified LdBPK\_250018100.1 to be from the C5 DNA MTase family, 2) all 10 conserved  
263 domains were present, we decided to check also for the presence and functional role of C5 DNA  
264 methylation in *L. donovani*. Therefore, we assessed the locations and degree of CpG, CHG and CHH  
265 methylation across the entire *Leishmania* genome and within the two parasite life stages:  
266 amastigotes (intracellular mammalian life stage) and promastigotes (extracellular, insect life stage).  
267 Amastigotes were derived directly from infected hamsters, while promastigotes were obtained from  
268 axenic cultures. Promastigotes were divided in two batches, one passaged long-term in axenic  
269 culture, the other passaged once through a hamster and then sequenced at axenic passage 3, thus  
270 allowing us to study also the effect of long versus- short term *in vitro* passaging. *Arabidopsis thaliana*  
271 and *T. brucei* were included as a positive control as the degree of CpG, CHG and CHH methylation in  
272 *A. thaliana* is well known (63,64), while *T. brucei* is the only Trypanosomatid in which (low)  
273 methylation levels were previously detected by mass spectrometry (27).

274 An overview of all sequenced samples can be found in **Supplementary Table S2**. All *L. donovani*  
275 samples were sequenced with at least 30 million 100bp paired end reads (60 million total) per  
276 sample resulting in an average genomic coverage of at least 94X for the *Leishmania* samples. The *T.*  
277 *brucei* was sequenced with 69 million PE reads resulting in 171X average coverage and *A. thaliana* 27

278 million PE reads, resulting in 21X average coverage. Detailed mapping statistics can be found in  
279 **Supplementary Table S3**.

280 We first checked for global methylation patterns across the genome. Interestingly, we could not  
281 detect any methylated regions in *Leishmania donovani* promastigotes, both short (P3) and long-term  
282 *in vitro* passaged, nor in hamster derived promastigotes or amastigotes (**Fig. 3**). Minor increases in  
283 the CHH signal towards the start end of several chromosomes, were manually checked in IGV and  
284 attributed to poor mapping in (low complexity) telomeric regions. This was in contrast to our  
285 positive control, *Arabidopsis thaliana*, that showed clear highly methylated CpG, CHG and CHH  
286 patterns across the genome. This distribution was consistent with prior results with MethGO  
287 observed on *Arabidopsis thaliana*, confirming that our methylation detection workflow was working  
288 (58).

289 In a second phase, we checked for individual sites that were fully methylated (>80% of the  
290 sequenced DNA at that site) using BS-Seeker2 and filtering the results with our automated Python3  
291 workflow. CpG methylation in all three biological samples for *L. donovani* was lower than 0.0003%,  
292 CHG methylation lower than 0.0005% and CHH methylation lower than 0.0126% (**Table 1**,  
293 **Supplementary Table S4**). However, when this low number of detected 'methylated' sites was  
294 manually verified in IGV, they could all clearly be attributed to regions where BS-Seeker2 wrongly  
295 called methylated bases, either because of poor mapping (often in repetitive, low complexity  
296 regions) or of strand biases. In reliably mapped regions, there was clearly no methylation. Similarly,  
297 we detected 0.0001% of CpG methylation, 0.0006% of CHG methylation and 0.0040% of CHH  
298 methylation for *T. brucei*, which could all be attributed to mapping errors or strand biases. In *A.*  
299 *thaliana*, our positive control, we detected 21.05% of CpG methylation, 4.04% of CHG methylation  
300 and 0.31% of CHH methylation, which is similar as reported values in literature (65,66), and  
301 demonstrates that our bioinformatic workflow could accurately detect methylated sites. We also  
302 checked sites with a lower methylation degree (>40%), which gave higher percentages, but this  
303 could be attributed to the increased noise level at this resolution (**Supplementary Table S4**). Indeed,  
304 even when applying stringent coverage criteria (>25x) this approach is susceptible for false positive  
305 methylation calls, as we are checking millions of positions (in case of *Leishmania*, more than 5.8  
306 million CG sites, 3.9 million CHG sites and 9.3 million CHH sites).

307 To determine whether *LdDNMT* is essential and/or if it affects the C-5 DNA-methylation pattern, we  
308 also sequenced an *L. donovani* *DNMT* knock-out (*LdDNMT*<sup>-/-</sup>) line as well as a *DNMT* overexpressor  
309 (*LdDNMT*<sup>+</sup>). The successful generation of *LdDNMT*<sup>-/-</sup> and *LdDNMT*<sup>+</sup> was verified by calculating their  
310 *LdDNMT* copy number based on the sequencing coverage (**Figure 4**). Indeed, the copy number of the

311 *LdDNMT* gene in *LdDNMT*<sup>-/-</sup> was reduced to zero, while that of *LdDNMT*<sup>+</sup> was increased to 78  
312 copies. The overexpressor was also verified on the RNA level (**Table 2**) and showed a 2.5-fold higher  
313 expression than the corresponding wild type. Although the *LdDNMT*<sup>+</sup> initially seemed to have  
314 slightly higher methylation percentages (**Table 1, Supplementary Table S4**), none of these  
315 methylation sites passed our manual validation in IGV. Thus, we did not find evidence for  
316 methylation in either of these lines. Additionally, the fact that the *LdDNMT*<sup>-/-</sup> line was viable shows  
317 that *LdDNMT* is not an essential gene in promastigotes.

### 318 **Absence of C5 DNA Methylation as a *Leishmania* vs host DNA enrichment strategy**

319 The lack or low level of C5 DNA methylation opens the perspective for enriching *Leishmania* DNA in  
320 mixed parasite- host DNA samples, based on the difference in methylation status (the vertebrate  
321 host does show C5 DNA methylation). This could potentially be an interesting pre-enrichment step  
322 before whole genome sequencing analysis of clinical samples containing *Leishmania*. Furthermore,  
323 commercial kits for removing methylated DNA are readily available and typically contain a Methyl-  
324 CpG-binding domain (MBD) column, which binds methylated DNA while allowing unmethylated to  
325 flow through.

326 To test this if these kits can be used for *Leishmania*, we first generated artificially mixed samples  
327 using different ratios of *L. donovani* promastigote DNA with human DNA. Ratios were made starting  
328 from 1/15 to 1/15000, which reflects the real ratio of *Leishmania* vs human DNA in clinical samples  
329 (67). From these mixes, *Leishmania* DNA was enriched using NEBNext Microbiome DNA Enrichment  
330 Kit (NEB) that specifically binds methylated DNA, while the non-methylated remains in the  
331 supernatant. We observed an average 263 X enrichment of *Leishmania* versus human DNA (**Figure**  
332 **5**). This ranged between 378x for the lowest dilution (removing 99.8% of the human DNA) to 164x  
333 (removing 99.6% of the human DNA) in the highest diluted condition (1/15000 *Leishmania*:human).

334 Secondly, we wanted to test if enrichment via MBD columns worked equally well on *L. donovani*  
335 amastigotes for (a) fundamental reasons, as an (indirect) second method to detect if there are any  
336 methylation differences between promastigotes and amastigotes, and (b) practical reasons, as it the  
337 (intracellular) life stage encountered in clinical samples. Therefore, we also carried out this  
338 enrichment technique on 3 sets (3 strains) of hamster derived amastigotes and their promastigote  
339 controls. Similarly as in the previous experiment, *Leishmania*-human DNA mixes were generated in a  
340 1/1500 (*Leishmania*:human) ratio after which enrichment was carried out with the NEBNext  
341 Microbiome DNA Enrichment Kit. The enrichment worked well for both life stages, the promastigote  
342 samples were on average  $76.22 \pm 14.28$  times enriched and the amastigote samples  $61.68 \pm 4.23$   
343 times (**Table 3**).

## 344 Discussion

345 With this work, we present the first comprehensive study addressing the status of DNA-methylation  
346 in *Leishmania*.

347 We demonstrated that the *Leishmania* genome contains a C5-DNMT (*LdDNMT*) that contains all 10  
348 conserved *DNMT* domains. We also showed the gene is expressed at the RNA level. As the C5-DNMT  
349 family is diverse and several family members are known to have adopted (partially) distinct functions  
350 during the course of evolution, we were particularly interested in the position of this DNMT within  
351 the evolutionary tree of this family, as it could direct hypotheses about the function of this protein.  
352 We found that *LdDNMT* is in fact a DNMT6, just as those found in *L. major* and *T. brucei* (20).  
353 Interestingly, all other (non-Trypanosomatid) species studied so far had either multiple *DNMT6*  
354 copies and/or other *DNMT* subfamily members in their genomes (20,62). Therefore,  
355 *Trypanosomatids* might be a unique model species to further study the role of this elusive DNMT  
356 subfamily, as there can be no interaction with the effects of other DNMTs.

357 The fact that our *LdDNMT* knock-out line (verified by sequencing) was viable shows that DNMT6 is  
358 not essential for the survival of the parasite, at least in promastigotes and in our experimental  
359 conditions. However, at the same time one might hypothesize that DNMT6 does offer a selective  
360 advantage to the parasite. First of all, the sequence of DNMT core domains is extremely conserved  
361 across the tree of life and this is no different from those that we encountered in *Leishmania*.  
362 Secondly, *Leishmania* is characterised by a high genome plasticity and features extensive gene copy  
363 number differences between strains (68,69). Therefore, one might speculate that the parasite would  
364 have lost the gene long time ago if it did not provide any selective advantage.

365 In addition, we aimed to characterise the DNA-methylation patterns of the parasite's genome.  
366 Therefore, we carried out the first multi-life stage whole genome bisulfite sequencing experiment on  
367 *Leishmania* and Trypanosomatids in general. We checked both the promastigote (both culture and  
368 amastigote life stage). Surprisingly, we did not find any evidence for DNA methylation in *L. donovani*  
369 even though we checked both for large, regional patterns (sensitive for low levels of methylation  
370 over longer distances) and site-specific analyses (sensitive for high levels of methylation at individual  
371 sites). This could either mean that there is indeed no DNA-methylation in these species, or that was  
372 below our detection threshold. Regarding this detection threshold, two factors should be  
373 considered. Firstly, bisulfite sequencing and analysis allows for the detection of specific sites that are  
374 consistently methylated across the genomes of a mix of cells. For example, in our case, we looked  
375 for sites that are methylated in at least 80% or 40% of the cases. Thus, if *Leishmania* consistently  
376 methylates certain genomic positions, our pipeline would have uncovered this. However, if this

377 methylation would be more random, or occurring in only a small subset of cells, we would not be  
378 able to distinguish this for random sequencing errors, and as such, we cannot exclude this possibility.  
379 Secondly, bisulfite sequencing typically suffers from poor genomic coverage due to the harsh BS  
380 treatment of the DNA (70). In our *L. donovani* samples we covered at least 30.14% of the CpG sites,  
381 29.47% of the CHG sites and 24.23% of the CHH sites (even though having more than 90x average  
382 coverage). However, as there are millions of CpG, CHG and CHH sites in the genome, the chance is  
383 very small ( $0.75^n$ , with  $n$  = number of methylated sites) that we would not have detected methylated  
384 sites, even if present in low numbers.

385 In any case, it is hard to imagine that any of the typical Eukaryotic DNA methylation systems such as  
386 genomic imprinting, chromosome inactivation, gene expression regulation and/or the repression of  
387 transposable elements could be of significance with such low methylation levels. On the other hand,  
388 given its phylogenetic position, it is perfectly possible that DNMT6 has changed its biological activity  
389 and now carries out another function. Indeed, as we described above, a similar phenomenon was  
390 observed with DNMT2 that switched its substrate from DNA to tRNA during the course of evolution  
391 [16,17].

392 Correspondingly, we did not observe any detectable DNA methylation for *T. brucei*. These findings  
393 are, however, in contrast to what has been reported before by Militello et al., who detected 0.01%  
394 of 5MC in the *T. brucei* genome<sup>28</sup>. Also, the methylated (orthologous) loci described in this paper  
395 could not be confirmed in the current work. However, this is maybe not be surprising as the same  
396 authors reported later that TbDNMT might in fact methylate RNA, as they identified methylated sites  
397 in several tRNAs<sup>71</sup>. This would indeed explain why we do not observe C5-DNA methylation in *T.*  
398 *brucei* with high resolution, whole genome bisulfite sequencing, and further suggest that a similar  
399 substrate switch to tRNA has occurred for DNMT6, just like has occurred for DNMT2. Further  
400 functional characterisation of DNMT6 is required to verify this hypothesis.

401 From an applied perspective, this study opens new avenues for the enrichment of Trypanosomatid  
402 DNA from clinical samples, which often have an abundance of host DNA. Indeed, depletion of  
403 methylated DNA could be included as pre-enrichment step for existing enrichment approaches. For  
404 example, our group has recently obtained excellent sequencing results of clinical samples using  
405 SureSelect (97% of the samples for diagnostic SNPs, 83% for genome wide information for  
406 sequenced samples), but was not able to sequence samples below 0.006% of *Leishmania* DNA  
407 content (71). Perhaps the removal of methylated DNA could further enhance the sensitivity of this  
408 method. In the case of *Leishmania* the technique could even be useful both from enrichments from  
409 the mammalian hosts and the insect vector, as it was recently shown the phlebotomine vector also

410 carries Me<sup>5</sup>C in its genome (72). The depletion of methylated DNA as a pre-enrichment step before  
411 whole genome sequencing has also been successfully used before for the parasite *Plasmodium*  
412 *falciparum* (malaria) and shown to generate unbiased sequencing reads (73).

413 In conclusion, we demonstrated that the *Leishmania* genome encodes for a DNMT6, but DNA  
414 methylation is either absent or present in such low proportion that it is unlikely to have a major  
415 functional role. Instead, we suggest that more investigation at RNA level is required to address the  
416 function of DNMT6 in *Leishmania*. The absence of DNA-methylation provides a new working tool for  
417 the enrichment of *Leishmania* DNA in clinical samples, thus facilitating future parasitological studies.

## 418 **Data Availability**

419 Raw sequencing data is available in the Sequence Read Archive under project accession numbers  
420 PRJNA560731 and PRJNA560871. Individual sample accession numbers are available in  
421 **Supplementary Table S2**.

## 422 **Acknowledgments**

423 We thank Dr. Gaurav Zinta and Prof. Dr. Gerrit Beemster for providing us with the *A. thaliana* DNA,  
424 as well as Prof. Dr. Philippe Büscher and Nicolas Bebronne for the blood stream form of *T. brucei*  
425 *gambiense* MBA and Prof. Dr. Joachim Clos for the *Leishmania* expression vectors pCL3S and pCL3P.  
426 This work was supported by the Interuniversity Attraction Poles Program of Belgian Science Policy  
427 [P7/41 to J.C.D.] and by the organisation “Les amis des Instituts Pasteur à Bruxelles, asbl” [F.D.]. The  
428 computational resources and services used in this work were provided by the VSC (Flemish  
429 Supercomputer Center), funded by the Research Foundation - Flanders (FWO) and the Flemish  
430 Government – department EWI. This work was also supported by the Department of Economy,  
431 Science and Innovation in Flanders ITM-SOFIB (SINGLE project, to J-C D). We thank the Center of  
432 Medical Genetics at the University of Antwerp for hosting the NGS facility. BC is a post-doctoral  
433 fellow funded from the FWO [12V5319N].

## 434 **Author contributions**

435 Designed the experiments: B.C., F.D., G.D.M., J-C.D., M.A.D. Performed the experiments: B.C., F.D.,  
436 M.A.D. Analysed the data: B.C., F.D., P.M., K.L., M.A.D. Wrote the manuscript: B.C., F.D., P.M., K.L., J-  
437 C.D, M.A.D. All authors reviewed and approved the final version of the manuscript.

## 438 **Additional Information**

439 The authors declare no competing interests.

## 440 References

- 441 1. Jurkowski, T.P. and Jeltsch, A. (2011) On the evolutionary origin of eukaryotic DNA  
442 methyltransferases and Dnmt2. *PLoS One*, **6**, e28104.
- 443 2. Li, E. and Zhang, Y. (2014) DNA methylation in mammals. *Cold Spring Harb Perspect Biol*, **6**,  
444 a019133-a019133.
- 445 3. Vidal, E., Sayols, S., Moran, S., Guillaumet-Adkins, A., Schroeder, M.P., Royo, R., Orozco, M.,  
446 Gut, M., Gut, I., Lopez-Bigas, N. *et al.* (2017) A DNA methylation map of human cancer at  
447 single base-pair resolution. *Oncogene*, **36**, 5648.
- 448 4. Jin, Z. and Liu, Y. (2018) DNA methylation in human diseases. *Genes & diseases*, **5**, 1-8.
- 449 5. Guo, W., Chung, W.-Y., Qian, M., Pellegrini, M. and Zhang, M.Q. (2013) Characterizing the  
450 strand-specific distribution of non-CpG methylation in human pluripotent cells. *Nucleic acids*  
451 *research*, **42**, 3009-3016.
- 452 6. Lister, R., Pelizzola, M., Dowen, R.H., Hawkins, R.D., Hon, G., Tonti-Filippini, J., Nery, J.R., Lee,  
453 L., Ye, Z., Ngo, Q.M. *et al.* (2009) Human DNA methylomes at base resolution show  
454 widespread epigenomic differences. *Nature*, **462**, 315-322.
- 455 7. Tomizawa, S., Kobayashi, H., Watanabe, T., Andrews, S., Hata, K., Kelsey, G. and Sasaki, H.  
456 (2011) Dynamic stage-specific changes in imprinted differentially methylated regions during  
457 early mammalian development and prevalence of non-CpG methylation in oocytes.  
458 *Development (Cambridge, England)*, **138**, 811-820.
- 459 8. Xie, W., Barr, C.L., Kim, A., Yue, F., Lee, A.Y., Eubanks, J., Dempster, E.L. and Ren, B. (2012)  
460 Base-resolution analyses of sequence and parent-of-origin dependent DNA methylation in  
461 the mouse genome. *Cell*, **148**, 816-831.
- 462 9. Chédin, F. (2011) In Cheng, X. and Blumenthal, R. M. (eds.), *Progress in Molecular Biology*  
463 *and Translational Science*. Academic Press, Vol. 101, pp. 255-285.
- 464 10. Jones, P.A. and Liang, G. (2009) Rethinking how DNA methylation patterns are maintained.  
465 *Nature reviews. Genetics*, **10**, 805-811.
- 466 11. Jurkowski, T.P., Meusburger, M., Phalke, S., Helm, M., Nellen, W., Reuter, G. and Jeltsch, A.  
467 (2008) Human DNMT2 methylates tRNA(Asp) molecules using a DNA methyltransferase-like  
468 catalytic mechanism. *RNA*, **14**, 1663-1670.
- 469 12. Tuorto, F., Liebers, R., Musch, T., Schaefer, M., Hofmann, S., Kellner, S., Frye, M., Helm, M.,  
470 Stoecklin, G. and Lyko, F. (2012) RNA cytosine methylation by Dnmt2 and NSun2 promotes  
471 tRNA stability and protein synthesis. *Nature Structural & Molecular Biology*, **19**, 900.
- 472 13. Burgess, A.L., David, R. and Searle, I.R. (2015) Conservation of tRNA and rRNA 5-  
473 methylcytosine in the kingdom Plantae. *BMC plant biology*, **15**, 199.
- 474 14. Schaefer, M., Pollex, T., Hanna, K. and Lyko, F. (2009) RNA cytosine methylation analysis by  
475 bisulfite sequencing. *Nucleic acids research*, **37**, e12-e12.
- 476 15. Jeltsch, A., Ehrenhofer-Murray, A., Jurkowski, T.P., Lyko, F., Reuter, G., Ankri, S., Nellen, W.,  
477 Schaefer, M. and Helm, M. (2016) Mechanism and biological role of Dnmt2 in Nucleic Acid  
478 Methylation. *RNA biology*, **14**, 1108-1123.
- 479 16. Ponts, N., Fu, L., Harris, E.Y., Zhang, J., Chung, D.-W.D., Cervantes, M.C., Prudhomme, J.,  
480 Atanasova-Penichon, V., Zehraoui, E., Bunnik, E.M. *et al.* (2013) Genome-wide mapping of  
481 DNA methylation in the human malaria parasite *Plasmodium falciparum*. *Cell host &*  
482 *microbe*, **14**, 696-706.
- 483 17. Motorin, Y. and Grosjean, H. (1999) Multisite-specific tRNA:m5C-methyltransferase (Trm4) in  
484 yeast *Saccharomyces cerevisiae*: identification of the gene and substrate specificity of the  
485 enzyme. *RNA*, **5**, 1105-1118.
- 486 18. Jeltsch, A., Nellen, W. and Lyko, F. (2006) Two substrates are better than one: dual  
487 specificities for Dnmt2 methyltransferases. *Trends in biochemical sciences*, **31**, 306-308.
- 488 19. Kaiser, S., Jurkowski, T.P., Kellner, S., Schneider, D., Jeltsch, A. and Helm, M. (2016) The RNA  
489 methyltransferase Dnmt2 methylates DNA in the structural context of a tRNA. *RNA biology*,  
490 **14**, 1241-1251.



- 491 20. Ponger, L. and Li, W.H. (2005) Evolutionary diversification of DNA methyltransferases in  
492 eukaryotic genomes. *Molecular biology and evolution*, **22**, 1119-1128.
- 493 21. Wei, H., Jiang, S., Chen, L., He, C., Wu, S. and Peng, H. (2017) Characterization of Cytosine  
494 Methylation and the DNA Methyltransferases of *Toxoplasma gondii*. *Int J Biol Sci*, **13**, 458-  
495 470.
- 496 22. Morselli, M., Pastor, W.A., Montanini, B., Nee, K., Ferrari, R., Fu, K., Bonora, G., Rubbi, L.,  
497 Clark, A.T., Ottonello, S. *et al.* (2015) In vivo targeting of de novo DNA methylation by  
498 histone modifications in yeast and mouse. *eLife*, **4**, e06205.
- 499 23. Greer, E.L., Blanco, M.A., Gu, L., Sendinc, E., Liu, J., Aristizábal-Corrales, D., Hsu, C.-H.,  
500 Aravind, L., He, C. and Shi, Y. (2015) DNA Methylation on N6-Adenine in *C. elegans*. *Cell*, **161**,  
501 868-878.
- 502 24. Ivens, A.C., Peacock, C.S., Worthey, E.A., Murphy, L., Aggarwal, G., Berriman, M., Sisk, E.,  
503 Rajandream, M.A., Adlem, E., Aert, R. *et al.* (2005) The genome of the kinetoplastid parasite,  
504 *Leishmania major*. *Science (New York, N.Y.)*, **309**, 436-442.
- 505 25. van Luenen, H.G.A.M., Farris, C., Jan, S., Genest, P.-A., Tripathi, P., Velds, A., Kerkhoven,  
506 R.M., Nieuwland, M., Haydock, A., Ramasamy, G. *et al.* (2012) Glucosylated  
507 hydroxymethyluracil, DNA base J, prevents transcriptional readthrough in *Leishmania*. *Cell*,  
508 **150**, 909-921.
- 509 26. Huff, J.T. and Zilberman, D. (2014) Dnmt1-independent CG methylation contributes to  
510 nucleosome positioning in diverse eukaryotes. *Cell*, **156**, 1286-1297.
- 511 27. Militello, K.T., Wang, P., Jayakar, S.K., Pietrasik, R.L., Dupont, C.D., Dodd, K., King, A.M. and  
512 Valenti, P.R. (2008) African Trypanosomes Contain 5-Methylcytosine in Nuclear DNA.  
513 *Eukaryotic Cell*, **7**, 2012-2016.
- 514 28. Bateman, A., Smart, A., Luciani, A., Salazar, G.A., Mistry, J., Richardson, L.J., Qureshi, M., El-  
515 Gebali, S., Potter, S.C., Finn, R.D. *et al.* (2018) The Pfam protein families database in 2019.  
516 *Nucleic acids research*, **47**, D427-D432.
- 517 29. Dumetz, F., Imamura, H., Sanders, M., Seblova, V., Myskova, J., Pescher, P., Vanaerschot, M.,  
518 Meehan, C.J., Cuypers, B., De Muylder, G. *et al.* (2017) Modulation of Aneuploidy in  
519 *Leishmania donovani* during Adaptation to Different In Vitro and In Vivo Environments and  
520 Its Impact on Gene Expression. *mBio*, **8**.
- 521 30. Berriman, M., Ghedin, E., Hertz-Fowler, C., Blandin, G., Renauld, H., Bartholomeu, D.C.,  
522 Lennard, N.J., Caler, E., Hamlin, N.E., Haas, B. *et al.* (2005) The genome of the African  
523 trypanosome *Trypanosoma brucei*. *Science (New York, N.Y.)*, **309**, 416-422.
- 524 31. Aslett, M., Aurrecochea, C., Berriman, M., Brestelli, J., Brunk, B.P., Carrington, M.,  
525 Depledge, D.P., Fischer, S., Gajria, B., Gao, X. *et al.* (2010) TriTrypDB: a functional genomic  
526 resource for the Trypanosomatidae. *Nucleic acids research*, **38**, D457-462.
- 527 32. Aurrecochea, C., Brestelli, J., Brunk, B.P., Dommer, J., Fischer, S., Gajria, B., Gao, X., Gingle,  
528 A., Grant, G., Harb, O.S. *et al.* (2009) PlasmoDB: a functional genomic database for malaria  
529 parasites. *Nucleic acids research*, **37**, D539-543.
- 530 33. Auburn, S., Böhme, U., Steinbiss, S., Trimarsanto, H., Hostetler, J., Sanders, M., Gao, Q.,  
531 Nosten, F., Newbold, C.I., Berriman, M. *et al.* (2016) A new *Plasmodium vivax* reference  
532 sequence with improved assembly of the subtelomeres reveals an abundance of pir genes.  
533 *Wellcome open research*, **1**, 4-4.
- 534 34. Gardner, M.J., Hall, N., Fung, E., White, O., Berriman, M., Hyman, R.W., Carlton, J.M., Pain,  
535 A., Nelson, K.E., Bowman, S. *et al.* (2002) Genome sequence of the human malaria parasite  
536 *Plasmodium falciparum*. *Nature*, **419**, 498-511.
- 537 35. Puiu, D., Enomoto, S., Buck, G.A., Abrahamsen, M.S. and Kissinger, J.C. (2004) CryptoDB: the  
538 *Cryptosporidium* genome resource. *Nucleic acids research*, **32**, D329-331.
- 539 36. Abrahamsen, M.S., Templeton, T.J., Enomoto, S., Abrahante, J.E., Zhu, G., Lancto, C.A., Deng,  
540 M., Liu, C., Widmer, G., Tzipori, S. *et al.* (2004) Complete genome sequence of the  
541 apicomplexan, *Cryptosporidium parvum*. *Science (New York, N.Y.)*, **304**, 441-445.

- 542 37. Xu, P., Widmer, G., Wang, Y., Ozaki, L.S., Alves, J.M., Serrano, M.G., Puiu, D., Manque, P.,  
543 Akiyoshi, D., Mackey, A.J. *et al.* (2004) The genome of *Cryptosporidium hominis*. *Nature*,  
544 **431**, 1107-1112.
- 545 38. Gajria, B., Bahl, A., Brestelli, J., Dommer, J., Fischer, S., Gao, X., Heiges, M., Iodice, J.,  
546 Kissinger, J.C., Mackey, A.J. *et al.* (2008) ToxoDB: an integrated *Toxoplasma gondii* database  
547 resource. *Nucleic acids research*, **36**, D553-556.
- 548 39. Lorenzi, H., Khan, A., Behnke, M.S., Namasivayam, S., Swapna, L.S., Hadjithomas, M.,  
549 Karamycheva, S., Pinney, D., Brunk, B.P., Ajioka, J.W. *et al.* (2016) Local admixture of  
550 amplified and diversified secreted pathogenesis determinants shapes mosaic *Toxoplasma*  
551 *gondii* genomes. *Nature communications*, **7**, 10147.
- 552 40. Ebenezer, T.E., Zoltner, M., Burrell, A., Nenarokova, A., Novák Vanclová, A.M.G., Prasad, B.,  
553 Soukal, P., Santana-Molina, C., O'Neill, E., Nankisoor, N.N. *et al.* (2019) Transcriptome,  
554 proteome and draft genome of *Euglena gracilis*. *BMC Biology*, **17**, 11.
- 555 41. Lorenzi, H.A., Puiu, D., Miller, J.R., Brinkac, L.M., Amedeo, P., Hall, N. and Caler, E.V. (2010)  
556 New assembly, reannotation and analysis of the *Entamoeba histolytica* genome reveal new  
557 genomic features and protein content information. *PLoS Negl Trop Dis*, **4**, e716.
- 558 42. Wood, V., Gwilliam, R., Rajandream, M.A., Lyne, M., Lyne, R., Stewart, A., Sgouros, J., Peat,  
559 N., Hayles, J., Baker, S. *et al.* (2002) The genome sequence of *Schizosaccharomyces pombe*.  
560 *Nature*, **415**, 871-880.
- 561 43. Galagan, J.E., Calvo, S.E., Borkovich, K.A., Selker, E.U., Read, N.D., Jaffe, D., FitzHugh, W., Ma,  
562 L.J., Smirnov, S., Purcell, S. *et al.* (2003) The genome sequence of the filamentous fungus  
563 *Neurospora crassa*. *Nature*, **422**, 859-868.
- 564 44. Sebahia, M., Peck, M.W., Minton, N.P., Thomson, N.R., Holden, M.T., Mitchell, W.J., Carter,  
565 A.T., Bentley, S.D., Mason, D.R., Crossman, L. *et al.* (2007) Genome sequence of a proteolytic  
566 (Group I) *Clostridium botulinum* strain Hall A and comparative analysis of the clostridial  
567 genomes. *Genome research*, **17**, 1082-1092.
- 568 45. Hoskins, J., Alborn, W.E., Jr., Arnold, J., Blaszcak, L.C., Burgett, S., DeHoff, B.S., Estrem, S.T.,  
569 Fritz, L., Fu, D.J., Fuller, W. *et al.* (2001) Genome of the bacterium *Streptococcus*  
570 *pneumoniae* strain R6. *Journal of bacteriology*, **183**, 5709-5717.
- 571 46. Huang, Y.Y., Cho, S.T., Lo, W.S., Wang, Y.C., Lai, E.M. and Kuo, C.H. (2015) Complete Genome  
572 Sequence of *Agrobacterium tumefaciens* Ach5. *Genome announcements*, **3**.
- 573 47. Parkhill, J., Dougan, G., James, K.D., Thomson, N.R., Pickard, D., Wain, J., Churcher, C.,  
574 Mungall, K.L., Bentley, S.D., Holden, M.T. *et al.* (2001) Complete genome sequence of a  
575 multiple drug resistant *Salmonella enterica* serovar Typhi CT18. *Nature*, **413**, 848-852.
- 576 48. Murat, C., Payen, T., Noel, B., Kuo, A., Morin, E., Chen, J., Kohler, A., Krizsan, K., Balestrini, R.,  
577 Da Silva, C. *et al.* (2018) Pezizomycetes genomes reveal the molecular basis of  
578 ectomycorrhizal truffle lifestyle. *Nature ecology & evolution*, **2**, 1956-1965.
- 579 49. Kumar, S., Stecher, G., Li, M., Niyaz, C. and Tamura, K. (2018) MEGA X: Molecular  
580 Evolutionary Genetics Analysis across Computing Platforms. *Molecular biology and*  
581 *evolution*, **35**, 1547-1549.
- 582 50. Edgar, R.C. (2004) MUSCLE: multiple sequence alignment with high accuracy and high  
583 throughput. *Nucleic acids research*, **32**, 1792-1797.
- 584 51. Glez-Peñalva, D., Gilmez-Blanco, D., Reboiro-Jato, M., Fdez-Riverola, F. and Posada, D.  
585 (2010) ALTER: program-oriented conversion of DNA and protein alignments. *Nucleic acids*  
586 *research*, **38**, W14-W18.
- 587 52. Tihon, E., Imamura, H., Dujardin, J.C., Van Den Abbeele, J. and Van den Broeck, F. (2017)  
588 Discovery and genomic analyses of hybridization between divergent lineages of  
589 *Trypanosoma congolense*, causative agent of Animal African Trypanosomiasis. *Molecular*  
590 *ecology*, **26**, 6524-6538.
- 591 53. LeBowitz, J.H. (1994) Transfection experiments with *Leishmania*. *Methods in cell biology*, **45**,  
592 65-78.

- 593 54. Morales, M.A., Watanabe, R., Dacher, M., Chafey, P., Osorio y Fortea, J., Scott, D.A.,  
594 Beverley, S.M., Ommen, G., Clos, J., Hem, S. *et al.* (2010) Phosphoproteome dynamics reveal  
595 heat-shock protein complexes specific to the *Leishmania donovani* infectious stage. *Proc*  
596 *Natl Acad Sci U S A*, **107**, 8381-8386.
- 597 55. Dumetz, F., Cuypers, B., Imamura, H., Zander, D., D'Haenens, E., Maes, I., Domagalska, M.A.,  
598 Clos, J., Dujardin, J.C. and De Muylder, G. (2018) Molecular Preadaptation to Antimony  
599 Resistance in *Leishmania donovani* on the Indian Subcontinent. *mSphere*, **3**, e00548-00517.
- 600 56. Guo, W., Fiziev, P., Yan, W., Cokus, S., Sun, X., Zhang, M.Q., Chen, P.-Y. and Pellegrini, M.  
601 (2013) BS-Seeker2: a versatile aligning pipeline for bisulfite sequencing data. *BMC genomics*,  
602 **14**, 774.
- 603 57. Berardini, T.Z., Reiser, L., Li, D., Mezheritsky, Y., Muller, R., Strait, E. and Huala, E. (2015) The  
604 arabidopsis information resource: Making and mining the "gold standard" annotated  
605 reference plant genome. *genesis*, **53**, 474-485.
- 606 58. Liao, W.W., Yen, M.R., Ju, E., Hsu, F.M., Lam, L. and Chen, P.Y. (2015) MethGo: a  
607 comprehensive tool for analyzing whole-genome bisulfite sequencing data. *BMC genomics*,  
608 **16 Suppl 12**, S11.
- 609 59. Robinson, J.T., Thorvaldsdóttir, H., Wenger, A.M., Zehir, A. and Mesirov, J.P. (2017) Variant  
610 Review with the Integrative Genomics Viewer. *Cancer research*, **77**, e31-e34.
- 611 60. Decuypere, S., Vanaerschot, M., Rijal, S., Yardley, V., Maes, L., de Doncker, S., Chappuis, F.  
612 and Dujardin, J.C. (2008) Gene expression profiling of *Leishmania (Leishmania) donovani*:  
613 overcoming technical variation and exploiting biological variation. *Parasitology*, **135**, 183-  
614 194.
- 615 61. Cao, X., Aufsatz, W., Zilberman, D., Mette, M.F., Huang, M.S., Matzke, M. and Jacobsen, S.E.  
616 (2003) Role of the DRM and CMT3 Methyltransferases in RNA-Directed DNA Methylation.  
617 *Current Biology*, **13**, 2212-2217.
- 618 62. de Mendoza, A., Bonnet, A., Vargas-Landin, D.B., Ji, N., Li, H., Yang, F., Li, L., Hori, K.,  
619 Pflueger, J., Buckberry, S. *et al.* (2018) Recurrent acquisition of cytosine methyltransferases  
620 into eukaryotic retrotransposons. *Nature communications*, **9**, 1341.
- 621 63. Dubin, M.J., Zhang, P., Meng, D., Remigereau, M.S., Osborne, E.J., Paolo Casale, F., Drewe, P.,  
622 Kahles, A., Jean, G., Vilhjalmsón, B. *et al.* (2015) DNA methylation in *Arabidopsis* has a  
623 genetic basis and shows evidence of local adaptation. *eLife*, **4**, e05255.
- 624 64. Cokus, S.J., Feng, S., Zhang, X., Chen, Z., Merriman, B., Haudenschild, C.D., Pradhan, S.,  
625 Nelson, S.F., Pellegrini, M. and Jacobsen, S.E. (2008) Shotgun bisulphite sequencing of the  
626 *Arabidopsis* genome reveals DNA methylation patterning. *Nature*, **452**, 215-219.
- 627 65. Hsieh, T.F., Ibarra, C.A., Silva, P., Zemach, A., Eshed-Williams, L., Fischer, R.L. and Zilberman,  
628 D. (2009) Genome-wide demethylation of *Arabidopsis* endosperm. *Science (New York, N.Y.)*,  
629 **324**, 1451-1454.
- 630 66. Zemach, A., McDaniel, I.E., Silva, P. and Zilberman, D. (2010) Genome-wide evolutionary  
631 analysis of eukaryotic DNA methylation. *Science (New York, N.Y.)*, **328**, 916-919.
- 632 67. Verma, S., Kumar, R., Katara, G.K., Singh, L.C., Negi, N.S., Ramesh, V. and Salotra, P. (2010)  
633 Quantification of Parasite Load in Clinical Samples of Leishmaniasis Patients: IL-10 Level  
634 Correlates with Parasite Load in Visceral Leishmaniasis. *PLOS ONE*, **5**, e10107.
- 635 68. Cuypers, B., Berg, M., Imamura, H., Dumetz, F., De Muylder, G., Domagalska, M.A., Rijal, S.,  
636 Bhattarai, N.R., Maes, I. and Sanders, M. (2018) Integrated genomic and metabolomic  
637 profiling of ISC1, an emerging *Leishmania donovani* population in the Indian subcontinent.  
638 *Infection, Genetics and Evolution*, **62**, 170-178.
- 639 69. Imamura, H., Downing, T., Van den Broeck, F., Sanders, M.J., Rijal, S., Sundar, S., Mannaert,  
640 A., Vanaerschot, M., Berg, M., De Muylder, G. *et al.* (2016) Evolutionary genomics of  
641 epidemic visceral leishmaniasis in the Indian subcontinent. *eLife*, **5**.

- 642 70. Olova, N., Krueger, F., Andrews, S., Oxley, D., Berrens, R.V., Branco, M.R. and Reik, W. (2018)  
643 Comparison of whole-genome bisulfite sequencing library preparation strategies identifies  
644 sources of biases affecting DNA methylation data. *Genome Biol*, **19**, 33-33.
- 645 71. Domagalska, M.A., Imamura, H., Sanders, M., Van den Broeck, F., Bhattarai, N.R.,  
646 Vanaerschot, M., Maes, I., D'Haenens, E., Rai, K., Rijal, S. *et al.* (2019) Genomes of  
647 intracellular *Leishmania* parasites directly sequenced from patients. *bioRxiv*,  
648 676163.
- 649 72. Bewick, A.J., Vogel, K.J., Moore, A.J. and Schmitz, R.J. (2016) The evolution of DNA  
650 methylation and its relationship to sociality in insects. *bioRxiv*, 062455.
- 651 73. Oyola, S.O., Gu, Y., Manske, M., Otto, T.D., O'Brien, J., Alcock, D., Macinnis, B., Berriman, M.,  
652 Newbold, C.I., Kwiatkowski, D.P. *et al.* (2013) Efficient depletion of host DNA contamination  
653 in malaria clinical sequencing. *Journal of clinical microbiology*, **51**, 745-751.

654

655

## 656 Tables and Figures

### 657 Tables

658 **Table 1:** CpG, CHG and CHH methylation percentages in different *Leishmania donovani* lines (Ld),  
659 *Trypanosoma brucei* and *Arabidopsis thaliana* (positive control).

|           | CpG (%) | CHG (%) | CHH (%) |
|-----------|---------|---------|---------|
| LdPro     | 0.0003  | 0.0005  | 0.0126  |
| LdAmas    | 0.0001  | 0.0003  | 0.0073  |
| LdHamPro  | 0.0002  | 0.0005  | 0.0113  |
| LdDNMT+   | 0.0013  | 0.0026  | 0.0627  |
| LdDNMT-/- | 0.0002  | 0.0006  | 0.0079  |
| Tbrucei   | 0.0001  | 0.0006  | 0.0040  |
| Athaliana | 21.0473 | 4.0401  | 0.3141  |

660

661 **Table 2:** qPCR estimation of LdBPK\_251230 expression level (copy number) of Ldo-Pro and Ldo-  
662 DNMToverex.

|     | Ldo-Pro   | LdDNMT+   |
|-----|-----------|-----------|
| RNA | 1.53 ±0.2 | 3.78 ±0.3 |

663

664 **Table 3:** Enrichment (X) of *Leishmania* DNA in artificial mixtures of *Leishmania* and human DNA for  
665 promastigotes and amastigotes of 3 clinical isolates (BPK026, BPK275 and BPK282). Enrichments  
666 were carried out with the NEBNext Microbiome DNA Enrichment Kit (NEB).

|               | BPK026 | BPK275 | BPK282 | Average Enrichment (X) | St.Dev |
|---------------|--------|--------|--------|------------------------|--------|
| Promastigotes | 79.85  | 88.32  | 60.47  | 76.22                  | 14.28  |
| Amastigotes   | 64.83  | 56.87  | 63.33  | 61.68                  | 4.23   |

667

668

669

670

671 Figures

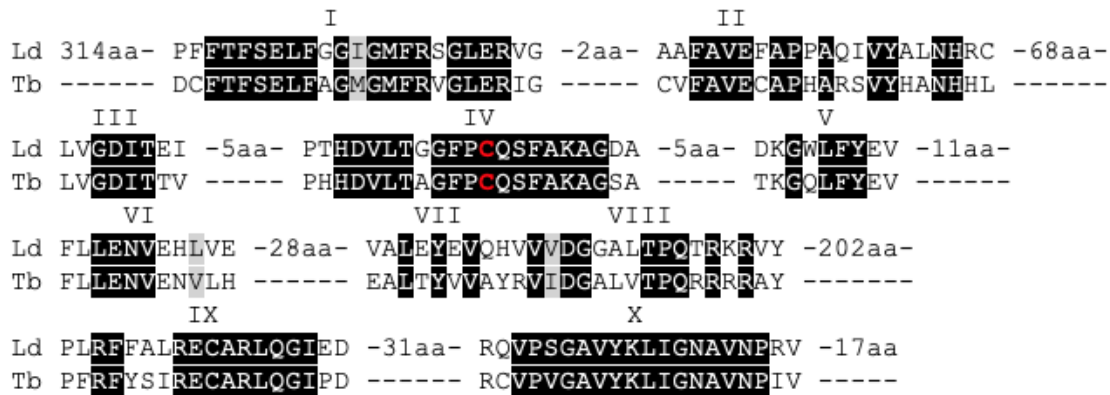

672

673 **Figure 1:** Protein alignment of LdDNMT (LdBPK\_250018100) and TbDNMT generated with T-coffee  
 674 picturing the similarities between the 10 homologous domains of C5 DNA methyltransferases. Black  
 675 highlights homology and the red character displays the position of the catalytic cysteine residue.  
 676

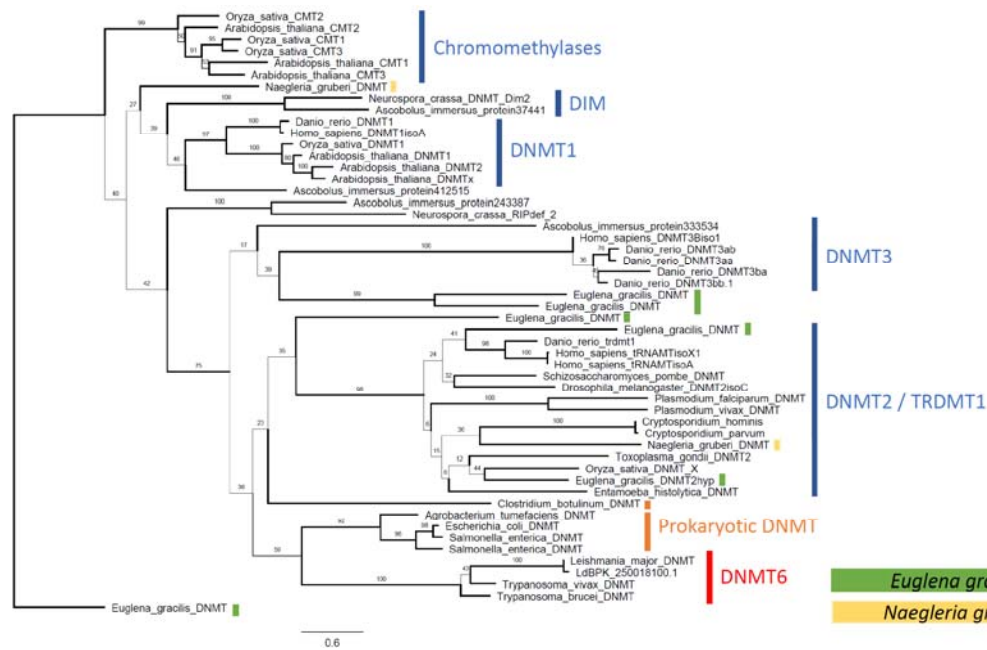

677

678 **Figure 2:** RAXML Maximum Likelihood tree showing the position of Trypanosomatid DNMT (DNMT 6)  
 679 within the DNMT family. Displayed branch bootstrap values are based on 1000 bootstraps.  
 680

681

682

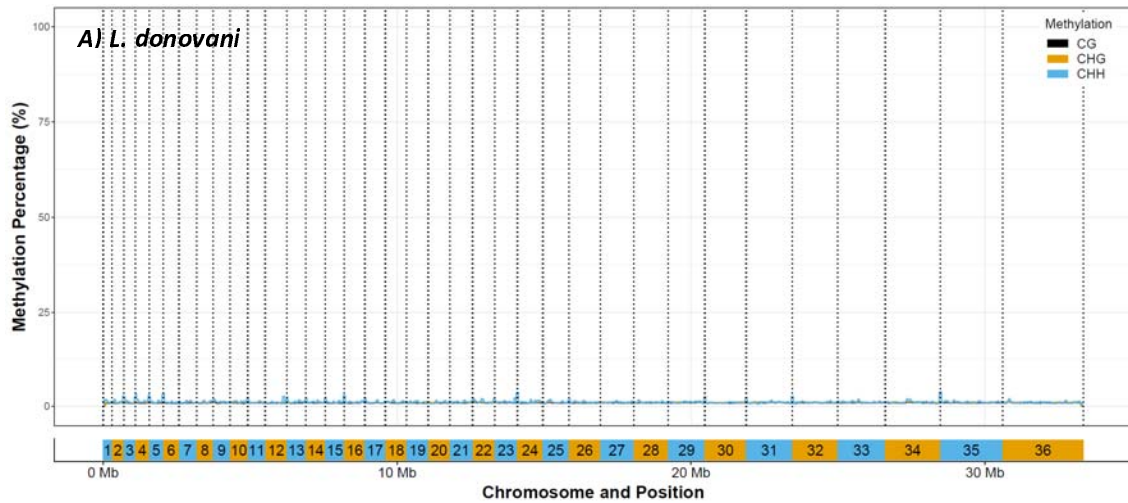

682

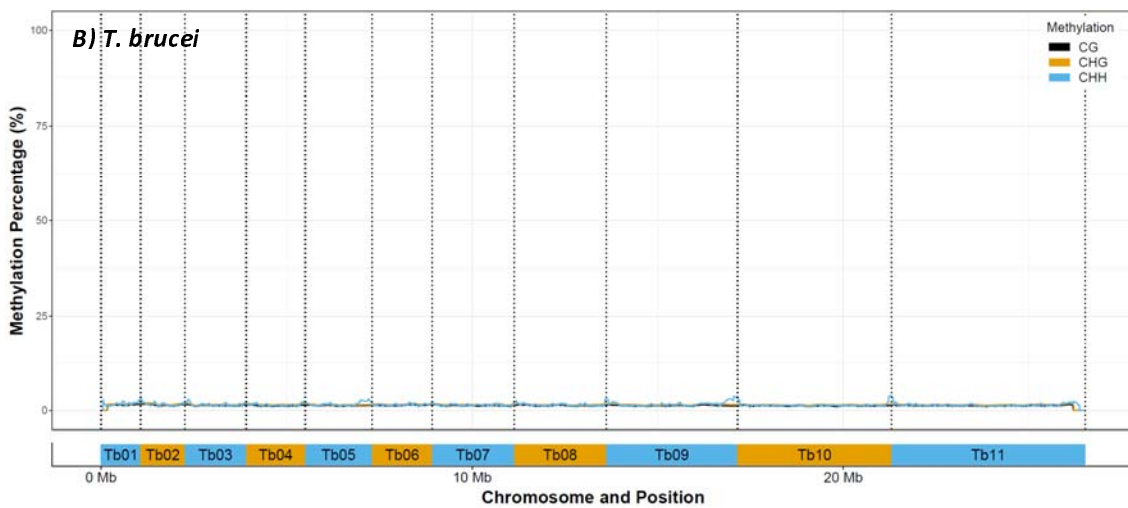

683

684

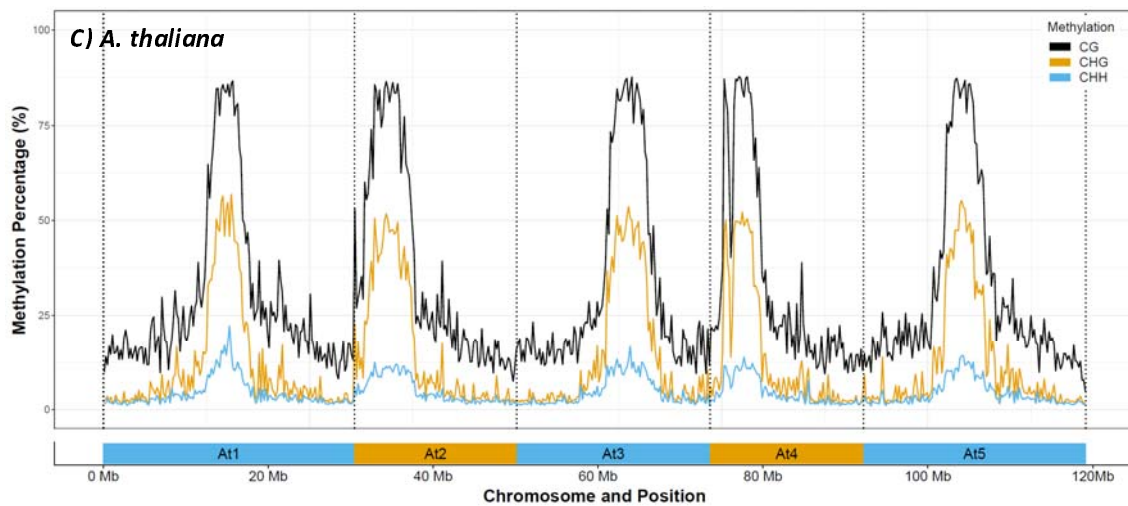

685

686 **Figure 3:** CpG, CHG and CHH genome-wide methylation patterns in A) *Leishmania donovani* BPK282  
687 (36 chromosomes), B) *Trypanosoma brucei brucei* TREU927 (11 chromosomes) and C) *Arabidopsis*  
688 *thaliana* Col-0 (5 chromosomes). Data was binned over 10 000 positions to remove local noise and  
689 variation.

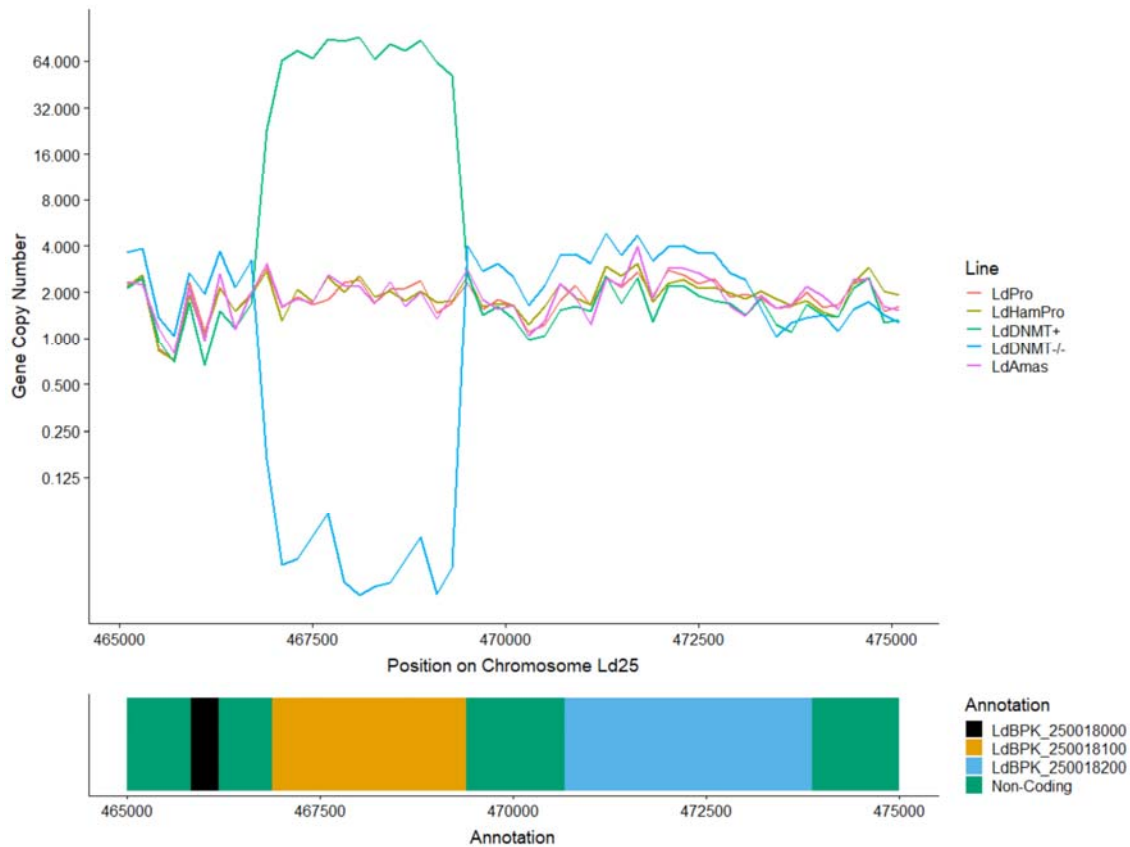

690

691 **Figure 4:** DNA/Gene copy number based on genomic sequencing depth on chromosome 25 position  
 692 465000-475000. Both the LdDNMT knock-out (LdDNMT<sup>-/-</sup>) and LdDNMT overexpressor line  
 693 (LdDNMT<sup>+</sup>) were successful with respectively 0 and 64 copies of the gene. The plot shows also that  
 694 the neighbouring genes LdBPK\_250018000 and LdBPK\_250018200 are unaffected and have the  
 695 standard disomic pattern.

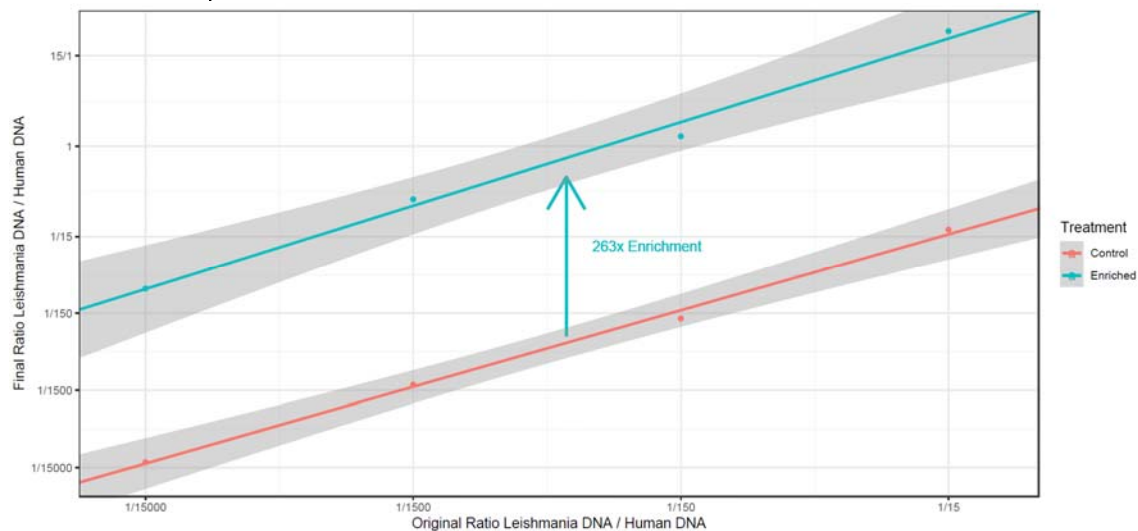

696

697 **Figure 5:** Enrichment (X) of *Leishmania* DNA in artificial mixtures of *Leishmania* promastigote DNA  
 698 and human DNA, with the mixtures ranging from 1:15 to 1:15000 *Leishmania*:human DNA.  
 699 Enrichments were carried out with the NEBNext Microbiome DNA Enrichment Kit (NEB) and the  
 700 unmethylated *Leishmania* DNA was enriched on average 263 times.
